# Supplementary material
Source: PubMed Central journal article supplement (PMC3079845)
Supplement: npp20114x1.pdf [file npp20114x1.pdf]

## Supplemental Methods.

**MeDIP Assay.** Because real time PCR threshold cycle (Ct) values for the background (control immunoprecipitation with mouse serum) MeDIP-qPCR measurements tend to be greater than 37 (which cannot be reproducibly measured) we used MeDIP DNA fractions' Ct value normalized to the Input DNA to compare experimental samples.

For MeDIP followed by real-time PCR assay the calculations were performed using following procedure:

1. Each MeDIP DNA fractions' Ct value was normalized to the Input DNA fraction Ct value for the same qPCR Assay ( $\Delta Ct$ ) to account for sample preparation differences using:

$$\Delta Ct [\text{normalized MeDIP}] = (Ct [\text{MeDIP}] - (Ct [\text{Input}] - \text{Log}_2 (\text{Input Dilution Factor})))$$

Normalized MeDIP Ct values were then averaged for replicate samples.

2. % Input for each MeDIP fraction (linear conversion of the normalized MeDIP  $\Delta Ct$ ) was calculated using the following formula:  
 $\% \text{ Input} = 2^{-\Delta Ct [\text{normalized CHIP}]}$
3. Finally, the difference between the normalized experimental sample (S2) and the control sample (S1) MeDIP fraction Ct values ( $\Delta \Delta Ct$ ) was determined using  
 $\Delta \Delta Ct [S2-S1] = \Delta Ct [S2:\text{normalized CHIP}] - \Delta Ct [S1:\text{normalized CHIP}]$
4. Differential Occupancy Fold Change (linear conversion of the second  $\Delta \Delta Ct$  to yield a fold change in site occupancy) was calculated:  
 $\text{Fold Change in Occupancy} = 2^{-\Delta \Delta Ct [S2-S1]}$

**Brain Dissections.** Specific regions were identified and macrodissected using their approximate mouse stereotaxic coordinates according to Mouse Brain Atlas (NAc, bregma +1.10mm; PFC ~ +2 to Bregma at posterior surface; VTA, bregma -3.64mm). Briefly, brains were positioned in a 1mm mouse brain matrix (ASI Instruments, Warren, MI, USA) abutting a razor blade placed in the first slot. The slot nearest the boundary of medulla was the first landmark. Next, double-edged razor blades were placed in slots one and two mm anterior to that boundary. Next, razor blades were placed in slots one, two and three mm posterior to blade at anterior surface. The anterior set of three blades was removed from the block. Proceeding anterior to posterior, the first section was discarded. From second section (~ +2 to Bregma at posterior surface), cortex was cut from dorsal half of section. From third section (~ +1 to Bregma at posterior surface), the nucleus accumbens was removed. Hypothalamus was dissected from the section in between blade 3 and 4. The slab was placed flat and the cuts were placed on either side of the optic chiasm and dorsal to the third ventricle. The posterior set of blades was removed from the block and VTA/SN region was dissected.

Table 1. List of TaqMan probes (ABI, Foster City, CA, USA) used for gene expression assays.

| <b>Gene Symbol</b> | <b>Gene Name</b>                         | <b>RefSeq mRNA</b> | <b>TaqMan Assay ID</b> |
|--------------------|------------------------------------------|--------------------|------------------------|
| Pomc               | pro-opiomelanocortin-alpha               | NM_008895.3        | Mm00435874_m1          |
| Pdyn               | prodynorphin                             | NM_018863.3        | Mm00457573_m1          |
| Penk               | preproenkephalin                         | NM_001002927.2     | Mm01212875_m1          |
| Oprk1              | opioid receptor, kappa 1                 | NM_011011.1        | Mm01230885_m1          |
| Oprm1              | opioid receptor, mu 1                    | NM_001039652.1     | Mm01188089_m1          |
| Oprd1              | opioid receptor, delta 1                 | NM_013622.3        | Mm01180757_m1          |
| Actb               | B-Actin                                  | NM_007393.1        | 4352933E               |
| GAPDH              | Glyceraldehyde 3-phosphate dehydrogenase | NM_008084.2        | 4352932E               |

Table 2. List of primers (SABiosciences, Frederick, MD, USA) used for MeDIP analysis.

| <b>Gene Symbol</b> | <b>Gene Name</b>                         | <b>Chromosome RefSeq #</b> | <b>TSS Position</b> | <b>Assay Position</b> | <b>SABiosciences ID</b> |
|--------------------|------------------------------------------|----------------------------|---------------------|-----------------------|-------------------------|
| Penk1              | Preproenkephalin                         | NC_000070.4                | 4065592             | -248                  | GPM048569(-)01A         |
| Oprm1              | Opioid receptor, mu 1                    | NC_000076.4                | 3557732             | -142                  | GPM041465(-)01A         |
| Gapdh              | Glyceraldehyde 3-phosphate dehydrogenase | NC_000072.4                | 125131222           | -399                  | GPM050651(-)01A         |
| IGX1A<br>Neg Ctrl  | 900 kb ORF-free intergenic region        | NC_000072.4                | N/A                 | 9746275               | GPM00001C(-)01A         |

Table 2. List of MOR primers (IDT, Coralville, IA, USA) used for ChIP analysis.

|          |                   |                                         |
|----------|-------------------|-----------------------------------------|
| 46291612 | S- 1091-Oprm-ChIP | 5'-ACA CTC AAA AGA GCT GTG GAG TTT C-3' |
| 46291613 | AS- 947-Oprm-ChIP | 5'- GGA CCT GCT TAG GAA GAT TTA TC-3'   |
| 46291614 | S-731-Oprm-ChIP   | 5'- CTT TGA ACA GGT TTG TGG GGT TG-3'   |
| 46291615 | AS-623-Oprm-ChIP  | 5' TTA CCC ACA TCC CCA TAT CTG A-3'     |
| 46291616 | S-565-Oprm-ChIP   | 5'-AAG AGT GTT GAG GTA TAA GGG T-3'     |
| 46291617 | AS-447-Oprm-ChIP  | 5'- GAG GGT GGG AAG AGA GAC TCT AAG-3'  |
